# Supplementary material for: Structure and mechanism of a tripartite ATP-independent periplasmic TRAP transporter
Source: PubMed Central journal article supplement (PMC9971032; doi:10.1038/s41467-023-36590-1), 2023-02-27
Supplement: 41467_2023_36590_MOESM3_ESM.pdf [file 41467_2023_36590_MOESM3_ESM.pdf]

**File name: Supplementary Data 1**

**Description:** PpSiaPQM tripartite model Rosetta relaxed

**File name: Supplementary Data 2**

**Description:** PpSiaPQM tripartite model with Modeller outward facing SiaM
